# Supplementary material for: Impact of the COVID-19 Pandemic on Consumers’ Access to Essential Medicines in Nigeria
Source: PubMed Central journal article supplement (PMC7543821; doi:10.4269/ajtmh.20-0838), 2020-08-18
Supplement: tpmd200838.SD1.pdf [file tpmd200838.SD1.pdf]

**Supplemental Table 1: Association between increase in cost of medicines across the six geo-political zones of Nigeria and across the different categories of disease conditions.**

| Variable                             | Increase in cost of medicines during pandemic |           | P-value |
|--------------------------------------|-----------------------------------------------|-----------|---------|
|                                      | Yes N (%)                                     | No N (%)  |         |
| <b>Geo-political zones</b>           |                                               |           |         |
| South-east                           | 100 (78.1)                                    | 28 (21.9) | 0.650   |
| South-south                          | 70 (76.9)                                     | 21 (23.1) |         |
| South-west                           | 52 (78.8)                                     | 14 (21.2) |         |
| North central                        | 42 (70.0)                                     | 18 (30.0) |         |
| North-east                           | 8 (88.9)                                      | 1 (11.1)  |         |
| North-west                           | 17 (85.0)                                     | 3 (15.0)  |         |
| Fisher's Exact Value = 0.727; df = 5 |                                               |           |         |
| <b>Disease condition</b>             |                                               |           |         |
| <i>Acute conditions</i>              |                                               |           |         |
| <b>YES N(%)</b>                      | 142 (75.5)                                    | 46 (24.5) | 0.419   |
| <b>NO N(%)</b>                       | 147 (79.0)                                    | 39 (21.0) |         |
| Fisher's Exact Value = 0.460; df = 1 |                                               |           |         |
| <i>Chronic conditions</i>            |                                               |           |         |
| <b>YES N(%)</b>                      | 142 (74.0)                                    | 50 (26.0) | 0.116   |
| <b>NO N(%)</b>                       | 147 (80.8)                                    | 35 (19.2) |         |
| Fisher's Exact Value = 0.139; df = 1 |                                               |           |         |

**Supplemental Table 2: Association between increased cost of medicines across the different categories of employment amongst respondents.**

| Variable                             | Impact of COVID-19 pandemic on income |           | P-value |
|--------------------------------------|---------------------------------------|-----------|---------|
|                                      | Yes N (%)                             | No N (%)  |         |
| <b>Employment</b>                    |                                       |           |         |
| Student                              | 20 (87.0)                             | 3 (13.0)  | 0.002   |
| Self-employed                        | 56 (81.2)                             | 13 (18.8) |         |
| Employed in private/public sector    | 154 (62.9)                            | 91 (37.1) |         |
| Unemployed                           | 30 (83.3)                             | 6 (16.7)  |         |
| Others                               | 1 (100.0)                             | 0 (0.0)   |         |
| Fisher's Exact Value = 0.001; df = 4 |                                       |           |         |
| <b>Diseases Condition</b>            |                                       |           |         |
| Acute condition                      | 139 (73.9)                            | 49 (26.0) |         |
| Chronic condition                    | 142 (73.9)                            | 50 (26.0) |         |
